# Supplementary material for: Cysteine oxidation and disulfide formation in the ribosomal exit tunnel
Source: Nat Commun. 2020 Nov 4;11:5569. doi: 10.1038/s41467-020-19372-x (PMC7642426; doi:10.1038/s41467-020-19372-x)
Supplement: Supplementary file 3 — Soure Data [file 41467_2020_19372_MOESM3_ESM.xlsx]

## Sheet: Figure 1c
Figure 1c	Cβ and Cα chemical shift (ppm) of cysteines in full-length GBC reduced and Cu(II) oxidized.
	GBC full-length reduced
	Cβ chemical shift (ppm)	Cα chemical shift (ppm)	cysteine
	33.3	53.75	15
	30.12	57.72	18
	29.66	56.53	22
	28	58.38	32
	29.79	58.18	41
	32.83	55.73	78
	28.93	56.13	109
	GBC full-length Cu(II) oxidized
	Cβ chemical shift (ppm)	Cα chemical shift (ppm)	cysteine
	33.362	53.749	15
	30.118	57.72	18
	38.392	61.096	22
	29.853	58.315	41
	32.303	56.794	78
	28.927	56.132	109

## Sheet: Figure 2a and b
Figure 2	Individual chemical shifts of the assigned peaks in the 13C DQ -SQ spectrum of the U32SecM cryo-Em sample in Figure 2a and b.
		U32SecM cryo-EM
		Cβ chemical shift (ppm)	Cβ+Cα (DQ) chemical shift (ppm)	Cα chemical shift (ppm)	peak number
		28.57	84.76	56.19	1
		30.79	88.16	57.37	2
		34.24	92.09	57.85	3
		37.61	93.18	55.57	4
		39.84	94.69	54.85	5
		41.12	95.85	54.73	6
		45.34	101.62	56.28	7
		40.37	92.41	52.04	8
		35.09	94.02	58.93	9
		33.65	94.6	60.95	10

## Sheet: Figure 2c 
	Integration values of each integration region for the U32SecM cryo-EM sample. Integration of the Cβ region for the determination of the relative integration ratio was carried out with Topspin 3.5 using the a+- mode. For the calculation of the integration error, the chemical shift region was varied slightly by +2 ppm for the oxidized and by -2 ppm reduced region in the SQ chemical shift dimension.…
Figure 2c
	sample	oxidized1	oxidized2	oxidized3	oxidized4	mean oxidized	Standard error of mean (oxidized)	reduced1	reduced2	reduced3	reduced4	mean reduced	Standard error of mean (reduced)	overlapping region1	overlapping region2	overlapping region3	overlapping region4	mean overlapping region	Standard error of mean (overlapping region)
	U32SecM_Cryo_EM	0.617314	0.627629	0.642117	0.627091	0.628538	0.00181613	0.21269	0.192537	0.171833	0.184288	0.190337	0.00858052	0.169996	0.179835	0.18605	0.188621	0.181125	0.00414286

## Sheet: Supplementary Figure 2
	The red lanes were used for generation of the Supplementary Figure 2a and b. The final samples were concentrated to 10-20 µM and 14-38 pmol was loaded on a NuPAGE 4-12 % (w/v) Bis-Tris gel (Thermo Fisher Scientific, Waltham, USA) for analysis by western blotting. The NC was detected using a Poly-His antibody (Merck, Darmstadt, Germany). The NC was released from the ribosome by addition of RNase A…
Supplementary Figure 2

## Sheet: Supplementary Figure 3+4
	Supplementary Figure 3+4		Backbone assignment of full-length GBC (reduced).								Backbone assignment of full-length GBC (Cu(II) oxidized).
Number	Amino acid	NH	N	Cα	Cβ	C -1				Number	Amino acid	NH	N	Cα	Cβ
2	Lys	8.26	122.3	57.46	35.08	174.06				2	Lys	8.25	122.3	57.46	35.08
3	Ile	8.7	129.33	59.11	41.37	172.34				3	Ile	8.7	129.33	59.11	41.37
4	Thr	8	120.58	61.23	70.03	170.53				4	Thr	8	120.58	61.23	70.03
5	Phe	8.46	126.12	56.4	40.38	171.87				5	Phe	8.46	126.16	56.4	40.38
6	Tyr	8.81	118.57	56.79	39.19	174.43				6	Tyr	8.81	118.57	56.79	39.19
7	Glu	8.91	118.74	59.44	30.71	177.7				7	Glu	8.91	118.74	59.44	30.71
8	Asp	7.9	115.32	52.36	43.69	177.02				8	Asp	7.9	115.32	52.36	43.69
9	Arg	8.68	118.81	56.86	30.58	175.72				9	Arg	8.68	118.81	56.86	30.58
10	Gly	8.78	105.77	47.2		177.8				10	Gly	8.78	105.77	47.2
11	Phe	8.11	114.5	56	35.02	174.11				11	Phe	8.11	114.5	56	35.02
12	Gln	6.18	116.75	53.68	31.97	174.51				12	Gln	6.18	116.7	53.68	31.97
13	Gly	8.27	104.92	43.95		174.27				13	Gly	8.27	104.92	43.95
14	His	8.76	119.28	57.92	31.24	174.2				14	His	8.76	119.28	57.92	31.24
15	Cys	7.29	118.09	53.75	33.1	173.59				15	Cys	7.46	116.96	53.75	33.36
16	Tyr	8.33	119.22	57.59	43.49	172.65				16	Tyr	8.33	119.22	57.59	43.49
17	Glu	7.7	128.79	54.48	32.04	172.47				17	Glu	7.7	128.8	54.28	32.1
18	Cys	9.08	124.21	57.72	30.12	173.49				18	Cys	9.08	124.25	57.72	30.12
20	Ser	8.25	116	57.52	66.33	173.15				22	Cys	9.47	123.19	61.1	38.39
21	Asp	8.18	117.64	55.67	40.58	172.06				24	Asn	7.69	116.75	53.29	37.66
22	Cys	9.52	122.5	56.53	29.66	177.77				25	Leu	8.62	125.94	54.68	42.89
24	Asn	7.66	116.62	53.29	37.73	175.36				26	Gln	7.65	118.88	59.57	27.6
25	Leu	8.58	125.92	54.68	42.89	174				28	Tyr	7.3	114.71	58.05	38.86
26	Gln	7.65	118.88	59.57	27.6	176.33				29	Phe	7.16	112.72	57.39	38.59
28	Tyr	7.3	114.71	58.05	38.86	176.44				30	Ser	9.77	114.72	59.97	65.27
29	Phe	7.16	112.72	57.39	38.59	175.82				31	Arg	8.09	119.49	54.94	34.09
30	Ser	9.77	114.7	59.97	65.27	174.07				32	Cys	9.66	119.99	58.45
31	Arg	8.09	119.49	54.94	30.98	174.14				33	Asn	8.42	109.12	60.43	64.4
32	Cys	9.66	120.01	58.38	28	173.04				34	Ser	9.09	118.46	60.63	45.08
33	Asn	8.62	121.6	53.22	43.62	172.28				35	Ile	8.78	125.21	55.73	33.03
34	Ser	8.42	109.17	60.43	64.4	174.29				36	Arg	9.57	128.68	62.29	32.1
35	Ile	9.09	118.46	60.63	45.08	172.49				37	Val	8.38	129.93	56.73	43.49
36	Arg	8.78	125.21	55.73	33.03	175.49				38	Asp	8	107.25	58.21	63.82
37	Val	9.58	128.93	62.16	31.84	175.94				39	Ser	8.92	111.78	43.89
38	Asp	8.38	129.94	56.73	43.49	176				40	Gly	7.91	116.49	58.31	29.85
39	Ser	8.13	107.78	58.12	63.91	175.82				41	Cys	8.79	122.74	55.67	33.1
40	Gly	8.92	111.83	43.89		174.66				42	Trp	9.45	122.12	53.09	34.62
41	Cys	7.98	116.83	58.18	29.79	171.38				43	Met	10.03	127.35	52.82	43.95
42	Trp	8.87	123.25	55.67	32.24	172.52				44	Leu	8.41	115.2	56.33	39.78
43	Met	9.68	122.81	53.15	34.35	174.24				45	Tyr	9.3	124.15	56.26	34.88
44	Leu	10.03	127.35	52.82	43.95	174.84				46	Glu	10.01	113.86	54.21	36.61
45	Tyr	8.41	115.2	56.33	39.78	175.29				50	Tyr	7.83	112.48	55.8	34.09
46	Glu	9.3	124.15	56.26	34.88	176.76				51	Gln	6.22	116.24	53.75	32.57
49	Asn	10.01	113.88	54.21	36.61	175.42				52	Gly	8.6	105.95	44.28
50	Tyr	7.77	112.86	56.26	33.76	173.85				55	Tyr	8.92	117.17	55.47	42.56
51	Gln	6.22	116.27	53.75	32.57	175.16				56	Phe	9.16	125.35	56.6	39.72
52	Gly	8.6	105.95	44.28		174.84				57	leu	9.32	132.48	55.87	47.06
55	Tyr	8.92	117.17	55.47	42.56	175.75				58	Arg	7.03	116.14	53.82	33.36
56	Phe	9.16	125.35	56.6	39.72	174.26				59	Arg	8.87	119.99	57.92	31.11
57	leu	9.32	132.48	55.87	47.06	175.81				60	Gly	8.58	112.25	44.35
58	Arg	7.03	116.14	53.82	33.36	173.48				61	Asp	8.17	119.34	53.62	42.56
59	Arg	8.87	119.99	58.12	31.11	175.4				64	Asp	7.15	115.18	52.95	43.82
60	Gly	8.63	112.59	44.48		175.88				65	Tyr	8.17	118.67	57.59	38.13
61	Asp	8.27	119.49	53.68	42.56	170.64				66	Gln	8.1	123.39	58.71	26.88
64	Asp	7.15	115.18	52.95	43.82	173.58				67	Gln	7.92	117.99	57.19	27.54
65	Tyr	8.17	118.67	57.59	38.13	176.44				68	Trp	7.03	115.66	56.93	27.47
66	Gln	8.1	123.39	58.71	26.88	178.06				69	Met	7.61	113.59	56.66	29.13
67	Gln	7.92	117.99	57.19	27.54	180.32				70	Gly	7.71	104.93	45.61
68	Trp	7.03	115.66	56.93	27.47	176.99				72	Asn	7.44	112.74	51.5	37.66
69	Met	7.61	113.61	56.66	29.13	174.23				73	Asp	7.78	114.5	52.95	39.05
70	Gly	7.71	104.93	45.61		176.21				74	Ser	7.99	112.86	57.59	63.88
72	Asn	7.44	112.74	51.5	37.66	175.21				75	Ile	8.85	130.36	59.38	38.19
73	Asp	7.78	114.5	52.95	39.05	171.66				76	Arg	8.86	121.24	55.8	33.63
74	Ser	7.99	112.86	57.59	63.88	175.71				77	Ser	8.24	111.12	59.9	65.46
75	Ile	8.85	130.36	59.38	38.19	175.19				78	Cys	9.26	111.85	56.79	32.3
76	Arg	8.86	121.24	56.26	33.63	174.79				79	Arg	10.13	122.12	56.59	34.88
77	Ser	8.31	111.65	60.37	64.8	175.88				88	Phe	9.25	127.21	57.12	40.31
78	Cys	9.42	112.24	55.73	32.83	173.54				89	Arg	9.28	119.59	56.79	35.15
79	Arg	10.1	121	54.21	35.08	171.45				90	Met	9.04	125.37	54.54	36.87
80	Leu	8.91	126.67	53.55	41.11	173.72				91	Arg	9.03	121.33	54.61	34.02
81	Ile	8.88	131.93	58.51	38.13	176.21				92	Ile	8.6	115.8	59.44	40.51
88	Phe	9.25	127.21	57.12	40.31	174.17				93	Tyr	8.2	118.33	57.39	40.58
89	Arg	9.28	119.59	56.79	35.15	175				94	Glu	8.03	118.94	58.38	32.9
90	Met	9.04	125.37	54.54	36.87	174.48				95	Arg	7.97	113.4	53.95	33.43
91	Arg	9.03	121.33	54.61	34.02	172.29				96	Asp	8.55	118.43	53.42	40.18
92	Ile	8.6	115.8	59.64	40.51	174.71				97	Asp	9.28	115.87	55.4	40.31
93	Tyr	8.2	118.33	57.26	40.51	173.54				98	Phe	8.22	109.1	54.15	33.56
94	Glu	8.03	118.94	58.38	32.9	176.46				99	Arg	6.51	117.91	54.87	32.57
95	Arg	7.97	113.4	53.95	33.43	176.65				100	Gly	8.38	104.79	44.02
96	Asp	8.55	118.43	53.42	40.31	175.03				101	Gln	8.82	119.66	57.79	29.46
97	Asp	9.28	115.87	55.4	40.25	175.27				102	Met	8.3	127.01	53.55	34.49
98	Phe	8.22	109.1	54.15	33.56	173.72				103	Ser	8.27	121.2	58.65	65.2
99	Arg	6.51	117.91	54.87	32.57	175.3				104	Glu	8.76	126.71	55.4	32.1
100	Gly	8.38	104.79	44.02		175.55				105	Ile	9.06	125.16	60.63	41.04
101	Gln	8.82	119.66	57.79	29.46	173.55				106	Thr	8.86	113.1	60.57	71.16
102	Met	8.3	127.01	53.55	34.49	175.01				107	Asp	7.93	122.84	51.7	43.42
103	Ser	8.27	121.2	58.65	65.2	176.68				108	Asp	8.11	116.55	55.6	40.84
104	Glu	8.76	126.71	55.4	32.1	171.37				109	Cys	9.36	120.49	56.13	28.93
105	Ile	9.06	125.16	60.63	41.04	174.85				112	Leu	8.42	133.78	59.31	41.57
106	Thr	8.86	113.06	60.57	71.16	175.52				113	Gln	8.53	121.68	59.51	28.27
107	Asp	7.93	122.84	51.7	43.42	172.99				114	Asp	8	118.44	56.73	40.58
108	Asp	8.11	116.55	55.73	40.84	173.58				115	Arg	7.17	114.47	57.52	31.57
109	Cys	9.36	120.51	56.13	28.93	176.44				116	Phe	7.9	113.24	56.93	41.11
112	Leu	8.42	133.78	59.31	41.57	175.39				117	His	7.64	115.53	57.12	27.34
113	Gln	8.53	121.68	59.51	28.27	178.93				118	Leu	6.98	116.99	54.01	45.54
114	Asp	8	118.44	56.73	40.58	178.14				119	Thr	8.76	108.95	61.56	69.97
115	Arg	7.17	114.47	57.52	31.57	176.94				120	Glu	7.6	119.83	54.68	34.42
116	Phe	7.9	113.27	56.93	41.11	176.49				121	Val	8.5	121.34	62.09	34.82
117	His	7.64	115.53	57.12	27.34	174.74				122	His	7.28	119.7	57.32	34.49
118	Leu	6.98	116.96	54.01	45.54	174.39				123	Ser	8.07	108.12	59.9	64.9
119	Thr	8.76	109.16	61.56	69.97	176.23				124	Leu	9.84	115.22	55.54	44.35
120	Glu	7.6	119.83	54.68	34.42	174.29				125	Asn	9.48	120.51	51.3	40.91
121	Val	8.5	121.34	62.09	34.82	175.27				126	Val	9.41	128.36	63.41	30.78
122	His	7.28	119.7	57.32	34.49	173.41				127	Leu	7.86	129.36	57.39	42.36
123	Ser	8.07	108.12	59.9	64.9	176.6				128	Glu	8.38	116.29	56.53	34.55
124	Leu	9.84	115.22	55.54	44.35	171.9				129	Gly	8.13	111.87	44.15
125	Asn	9.48	120.51	51.3	40.91	174.3				130	Ser	6.86	108.5	59.04	64.24
126	Val	9.41	128.36	63.41	30.78	175.24				131	Trp	8.9	121.92	55.73	33.36
127	Leu	7.86	129.33	57.39	42.36	175				132	Val	9.53	120.04	61.82	34.09
128	Glu	8.38	116.29	56.53	34.55	177.24				133	Leu	8.9	129.67	54.28	44.55
129	Gly	8.13	111.9	44.15		175.94				134	Tyr	8.86	121.37	56.4	39.12
130	Ser	6.86	108.48	59.04	64.24	169.66				135	Glu	9.47	124.4	58.85	33.63
131	Trp	8.9	121.88	55.73	33.36	173.33				136	Met	8.17	110.67	52.36	33.36
132	Val	9.53	120.04	61.82	34.09	173.41				138	Ser	9.51	110.48	58.58	61.03
133	Leu	8.9	129.61	54.28	44.55	173.77				139	Tyr	7.85	113.85	55.4	34.09
134	Tyr	8.86	121.29	56.4	39.12	174.56				140	Arg	6.23	116.16	53.82	34.02
135	Glu	9.47	124.4	58.85	33.63	177.47				141	Gly	8.17	106.28	44.61
136	Met	8.17	110.67	52.36	33.36	174.79				142	Arg	8.77	120.1	58.45	31.38
138	Ser	9.51	110.47	58.58	61.03	175.16				143	Gln	7.73	118.53	53.82	31.11
139	Tyr	7.85	113.85	55.4	34.09	172.99				144	Tyr	8.69	115.66	56.26	40.64
140	Arg	6.23	116.16	53.82	34.02	174.53				145	Leu	8.86	126.44	56.13	40.78
141	Gly	8.14	106.36	44.48		174.84				146	Leu	9.77	128.65	52.89	43.62
142	Arg	8.77	120.1	58.45	31.38	173.87				147	Arg	7.75	121.54	53.09	28.6
143	Gln	7.73	118.53	53.82	31.11	174.49				149	Gly	9.17	113.61	44.08
144	Tyr	8.69	115.66	56.26	40.64	175.4				150	Glu	8.28	115.93	56.73	32.1
145	Leu	8.86	126.4	56.13	40.78	174.79				151	Tyr	9.14	122.43	56.86	38.33
146	Leu	9.77	128.65	52.89	43.62	176.3				152	Arg	8.68	123.72	59.38	30.25
147	Arg	7.75	121.54	53.09	28.6	175.46				153	Arg	8	114.33	54.15	32.83
149	Gly	9.17	113.61	44.08		176.56				154	Tyr	7.92	119.36	57.99	37.07
150	Glu	8.28	115.93	57.32	32.1	171				156	Asp	7.92	117.89	57.19	41.04
151	Tyr	9.14	122.43	56.86	38.33	177.05				157	Trp	7.28	114.57	57.19	27.93
152	Arg	8.68	123.72	59.38	30.25	175.07				158	Gly	7.57	106.91	45.47
153	Arg	8	114.33	54.15	32.83	174				159	Ala	6.37	121.33	51.17	22.31
154	Tyr	7.92	119.36	57.99	37.07	176.95				160	Met	8.6	114.84	55.01	33.23
156	Asp	7.92	117.89	57.19	41.04	180.6				161	Asn	7.48	114.03	51.5	39.05
157	Trp	7.28	114.57	57.19	27.93	178.08				162	Ala	7.83	118.81	51.37	18.34
158	Gly	7.57	106.91	45.47		175.94				163	Lys	7.87	118.81	58.18	31.77
159	Ala	6.37	121.33	51.17	22.31	173.67				164	Val	7.59	122.15	61.89	35.61
160	Met	8.6	114.84	55.01	33.23	176.55				165	Gly	9.1	111.2	45.41	35.81
161	Asn	7.48	114.03	51.5	39.05	175.72				166	Ser	8.3	112.79	58.65	64.74
162	Ala	7.83	118.81	51.37	18.34	175.88				167	Leu	8.78	118.47	54.87	47.92
163	Lys	7.87	118.81	58.18	31.77	175.88				168	Arg	9.53	121.73	54.28	36.08
164	Val	7.59	122.15	61.89	35.61	177.04				169	Arg	8.5	124.69	55.73	29.59
165	Gly	9.1	111.22	45.41	35.81	174.24				170	Val	8.34	123.18	63.81	29.26
166	Ser	8.3	112.79	58.65	64.74	174.04				171	Met	7.18	125.9	54.21	36.47
167	Leu	8.78	118.47	54.87	47.92	172.57				172	Asp	8.46	122.12	52.95	41.83
168	Arg	9.53	121.68	54.28	36.08	174.85				173	Phe	8.39	120.54	57.92	40.18
169	Arg	8.5	124.69	55.73	29.59	174.23
170	Val	8.34	123.18	63.81	29.26	176.75
171	Met	7.17	125.91	54.21	36.47	172.74
172	Asp	8.45	122.17	52.95	41.83	173.68
173	Phe	8.39	120.72	57.92	40.18	175.65

## Sheet: Supplementary Figure 7+8
	Supplementary Figure 7 and 8	Individual chemical shifts of the assigned peaks in the 13C DQ -SQ spectrum of the samples in Figure 7 and 8.
	a					b					c
	U32SecM C18 C22					U32SecM C15 C18					U32SecM C18
	Cβ chemical shift (ppm)	Cβ+Cα (DQ) chemical shift (ppm)	Cα chemical shift (ppm)	peak number		Cβ chemical shift (ppm)	Cβ+Cα (DQ) chemical shift (ppm)	Cα chemical shift (ppm)	peak number		Cβ chemical shift (ppm)	Cβ+Cα (DQ) chemical shift (ppm)	Cα chemical shift (ppm)	peak number
	28.46	87.4	58.94	1		28.15	87.37	59.22	1		28.32	87.48	59.16	1
	31.32	89	57.68	2		31.09	89.11	58.02	2		31.32	90.06	58.74	2
	32.97	90.62	57.61	3		36.11	93.6	57.49	3		35.13	92.22	57.09	3
	35.34	90.05	54.71	4		38.37	94.56	56.19	4		38.8	96.37	57.57	4
	39.62	94.72	55.1	5		39.93	97.17	57.24	5		40.14	96.67	56.53	5
	41.6	96.93	55.33	6		41.39	95.38	53.99	6		41.35	97.87	56.52	6
	28.08	86.65	55.28	7		31.68	86.81	55.13	7		32.61	88.21	55.6	7
	d					e					f
	U32SecM					U43SecM					U78SecM
	Cβ chemical shift (ppm)	Cβ+Cα (DQ) chemical shift (ppm)	Cα chemical shift (ppm)	peak number		Cβ chemical shift (ppm)	Cβ+Cα (DQ) chemical shift (ppm)	Cα chemical shift (ppm)	peak number		Cβ chemical shift (ppm)	Cβ+Cα (DQ) chemical shift (ppm)	Cα chemical shift (ppm)	peak number
	28.51	85.41	56.9	1		28.49	87.37	58.88	1		28.27	87.2	58.93	1
	31.65	88.23	56.58	2		30.17	87.62	57.45	2		31.2	89.8	58.6	2
	34	89.6	55.6	3		31.61	89.34	57.73	3		38.34	95.5	57.16	3
	35.44	91	55.56	4		33.07	91.05	57.98	4		40.47	96.6	56.13	4
	38.46	93.14	54.68	5		36.89	92.02	55.13	5		42.26	98.6	56.34	5
	41.98	95.83	53.85	6		38.69	95.35	56.66	6		34	88.7	54.7	6
	31.25	86.07	54.82	7		40.43	94.81	54.04	7
	28.36	87.55	59.19	8		42	97.26	55.26	8
	28.72	89.62	60.9	9		44.01	100.23	56.22	9
	28.35	92.49	64.14	10		46.27	102.46	56.19	10
						33.41	88.8	55.39	11
						31.76	90.58	58.82	12

## Sheet: Supplementary Figure 9
Supplementary Figure 9			Integration values of each integration region for the solid-state NMR samples. Integration of the Cβ region for the determination of the relative integration ratio was carried out with Topspin 3.5 using the a+- mode. For the calculation of the integration error, the chemical shift region was varied slightly by +2 ppm for the oxidized and by -2 ppm reduced region in the SQ chemical shift dimension…
	sample name	oxidized1	oxidized2	oxidized3	oxidized4	mean oxidized	Standard error of mean (oxidized)	reduced1	reduced2	reduced3	reduced4	mean reduced	Standard error of mean (reduced)	overlapping region1	overlapping region2	overlapping region3	overlapping region4	mean overlapping region	Standard error of mean (overlapping region)
	U32SecM C18	0.1674	0.1777	0.1932	0.2214	0.189925	0.0117552	0.6171	0.6113	0.5996	0.5694	0.59935	0.010626	0.2155	0.2111	0.2071	0.2093	0.21075	0.00178209
	U32SecM C18 C22	0.1392	0.1619	0.1708	0.1815	0.16335	0.00899189	0.649	0.6368	0.6286	0.6281	0.635625	0.00488405	0.2117	0.2013	0.2006	0.1904	0.201	0.00435029
	U32SecM C15 C18	0.1721	0.1919	0.1906	0.1903	0.186225	0.00472112	0.6267	0.5993	0.597	0.6002	0.6058	0.00699917	0.2012	0.2088	0.2124	0.2095	0.207975	0.00238899
	U32SecM	0.246927	0.251498	0.257058	0.257342	0.253206	0.00248805	0.555597	0.554312	0.555242	0.549481	0.553658	0.0014184	0.197476	0.194189	0.187701	0.193177	0.193136	0.00203076
	U43SecM	0.3813	0.3905	0.3792	0.3764	0.38185	0.003053	0.4344	0.4281	0.437	0.4384	0.434475	0.00228085	0.1843	0.1814	0.1837	0.1852	0.18365	0.000810864
	U78SecM	0.3338	0.3435	0.3511	0.3424	0.3427	0.00354142	0.4904	0.4833	0.4796	0.4898	0.485775	0.00261163	0.1758	0.1731	0.1693	0.1678	0.1715	0.00181613
